# Supplementary material for: Recommendations for the classification of germline variants in the exonuclease domain of POLE and POLD1
Source: Springer Nature journal article supplement (doi:10.1186/s13073-023-01234-y), 2023-10-17
Supplement: MOESM1 [file 13073_2023_1234_MOESM1_ESM.pdf]

## ADDITIONAL FILE 1

### Supplementary Results

#### Population allele frequency threshold (AFT) calculation

To obtain a *POLE* and *POLD1* specific AFT we used the Whiffin/Ware calculator<sup>1</sup> (<http://cardiodb.org/allelefrequencyapp/>). We applied a conservative penetrance estimate (on the lower range) of 30%, and a prevalence of familial CRC of 1 in 770 in the general population (calculated from the Swedish nationwide cohort data: 12,829,251 people, 16,679 of whom are CRC patients with 1<sup>st</sup> or 2<sup>nd</sup>-degree relatives affected with CRC).<sup>2</sup> Data obtained by our group showed that the prevalence of *POLE* and *POLD1* pathogenic variants among familial CRC patients is ~0.6% (5/795 nonrelated CRC-affected individuals)<sup>3-5</sup>. Other relatively large studies<sup>6-9</sup> also detected prevalence values for *POLE* and *POLD1* pathogenic variants among familial CRC patients below 1%, only one<sup>10</sup> slightly exceeding that figure (~1.1%) (calculations made considering the pathogenic variants listed in Table 2). Based on these data, a value of 1% for the genetic contribution of *POLE* and *POLD1* pathogenic variants was considered (genetic heterogeneity: 0.01). Taking into consideration a 95% confidence interval (CI), the inferred AFT obtained for BA1, with allele heterogeneity set at 1, was  $2.16 \times 10^{-5}$  (0.002%) and for BS1, with allele heterogeneity set at 0.1,  $2.16 \times 10^{-6}$  (0.0002%).

**Table S1.** Standard ACMG/AMP combination rules to define pathogenic, likely pathogenic, likely benign and benign variants.<sup>11</sup>

| Pathogenic                                                                                                     | Likely pathogenic             | Likely benign             | Benign             |
|----------------------------------------------------------------------------------------------------------------|-------------------------------|---------------------------|--------------------|
| ≥ 2 Strong                                                                                                     | 1 Strong AND 1-2 Moderate     | 1 Strong AND 1 Supporting | 1 Stand Alone (BA) |
| 1 Strong AND:<br>a. ≥ 3 Moderate OR<br>b. 2 Moderate AND ≥ 2 Supporting OR<br>c. 1 Moderate AND ≥ 4 Supporting | 1 Strong AND ≥ 2 Supporting   | ≥ 2 Supporting            | ≥ 2 Strong         |
|                                                                                                                | ≥ 3 Moderate                  |                           |                    |
|                                                                                                                | 2 Moderate AND ≥ 2 Supporting |                           |                    |
|                                                                                                                | 1 Moderate AND ≥ 4 Supporting |                           |                    |

## REFERENCES

1. Whiffin N, Minikel E, Walsh R, et al. Using high-resolution variant frequencies to empower clinical genome interpretation. *Genet Med*. 2017;19(10):1151-1158.
2. Tian Y, Kharazmi E, Sundquist K, Sundquist J, Brenner H, Fallah M. Familial colorectal cancer risk in half siblings and siblings: nationwide cohort study. *BMJ*. 2019;364:1803.
3. Valle L, Hernández-Illán E, Bellido F, et al. New insights into POLE and POLD1 germline mutations in familial colorectal cancer and polyposis. *Hum Mol Genet*. 2014;23(13):3506-3512.
4. Bellido F, Pineda M, Aiza G, et al. POLE and POLD1 mutations in 529 kindred with familial colorectal cancer and/or polyposis: review of reported cases and recommendations for genetic testing and surveillance. *Genet Med*. 2016;18(4):325-332.
5. Mur P, García-Mulero S, Del Valle J, et al. Role of POLE and POLD1 in familial cancer. *Genet Med*. 2020.
6. Palles C, Cazier JB, Howarth KM, et al. Germline mutations affecting the proofreading domains of POLE and POLD1 predispose to colorectal adenomas and carcinomas. *Nat Genet*. 2013;45(2):136-144.
7. Elsayed FA, Kets CM, Ruano D, et al. Germline variants in POLE are associated with early onset mismatch repair deficient colorectal cancer. *Eur J Hum Genet*. 2015;23(8):1080-1084.
8. Buchanan DD, Stewart JR, Clendenning M, et al. Risk of colorectal cancer for carriers of a germline mutation in POLE or POLD1. *Genet Med*. 2018;20(8):890-895.
9. Palles C, Martin L, Domingo E, et al. The clinical features of polymerase proof-reading associated polyposis (PPAP) and recommendations for patient management. *Fam Cancer*. 2021.
10. Hamzaoui N, Alarcon F, Leulliot N, et al. Genetic, structural, and functional characterization of POLE polymerase proofreading variants allows cancer risk prediction. *Genet Med*. 2020.
11. Richards S, Aziz N, Bale S, et al. Standards and guidelines for the interpretation of sequence variants: a joint consensus recommendation of the American College of Medical Genetics and Genomics and the Association for Molecular Pathology. *Genet Med*. 2015;17(5):405-424.
